# Supplementary material
Source: Copernicus journal article supplement (doi:10.5194/egusphere-2026-1955)
Supplement: Supplementary file 1 [file egusphere-2026-1955-supplement.pdf]

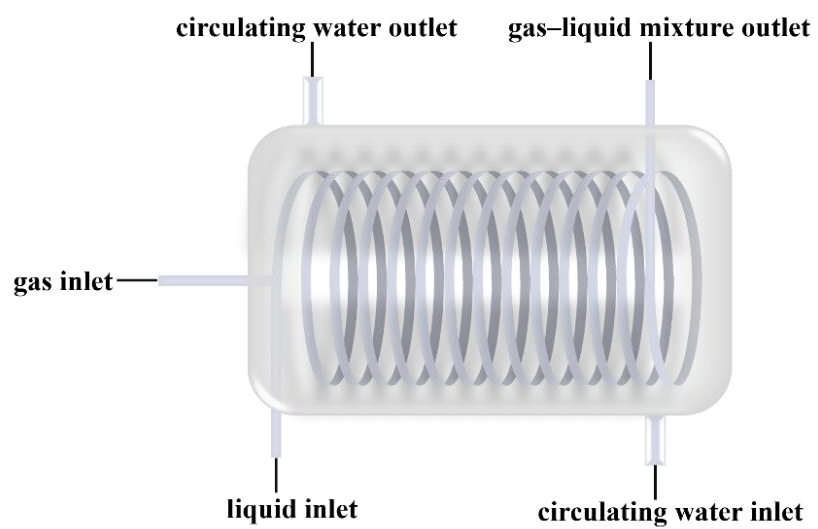

**Figure S1.** Structural diagram of the glass spiral coil

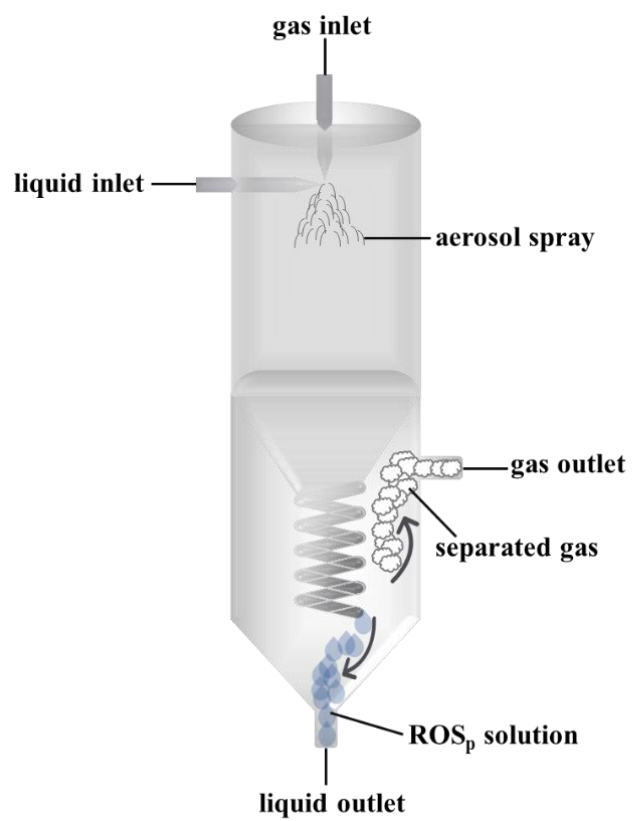

**Figure S2.** Structural diagram of the spray growth collection chamber

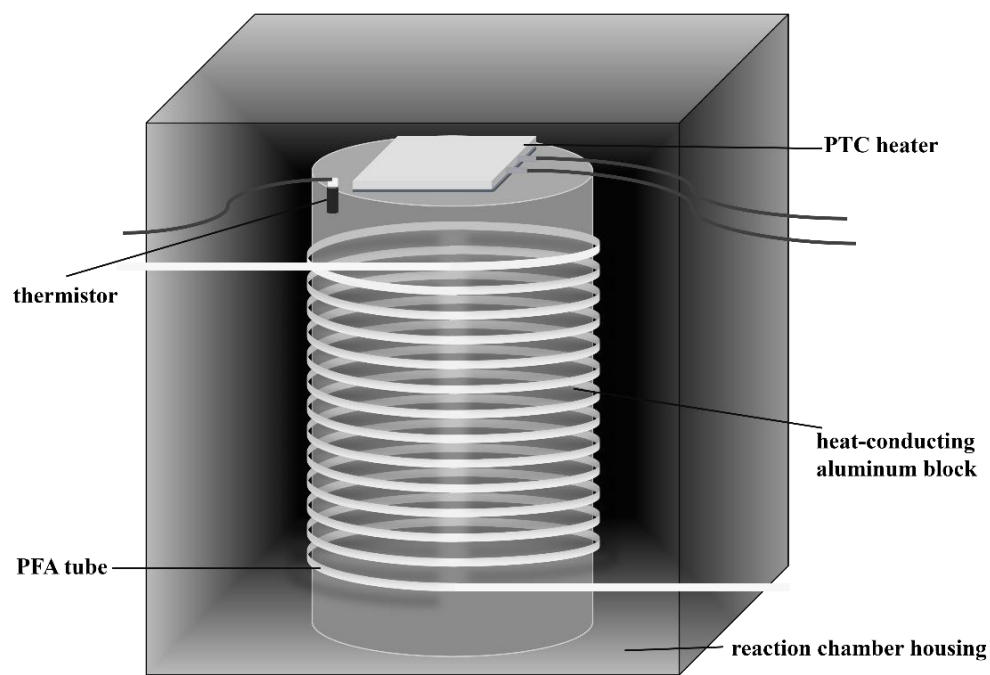

**Figure S3.** Structural diagram of the reaction chamber

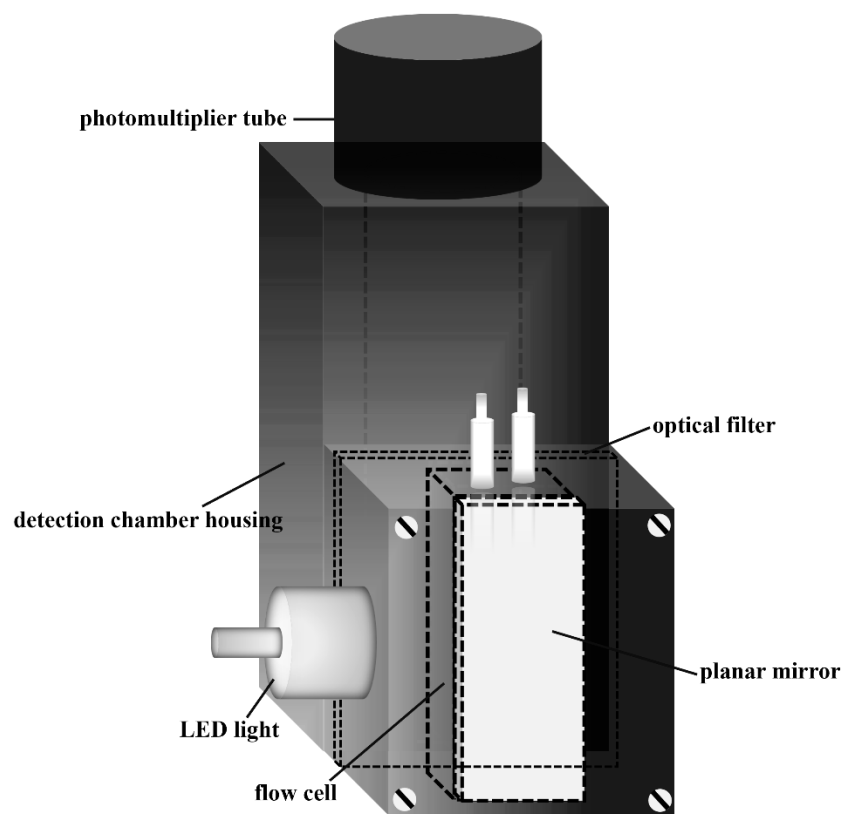

**Figure S4.** Structural diagram of the fluorescence detection chamber

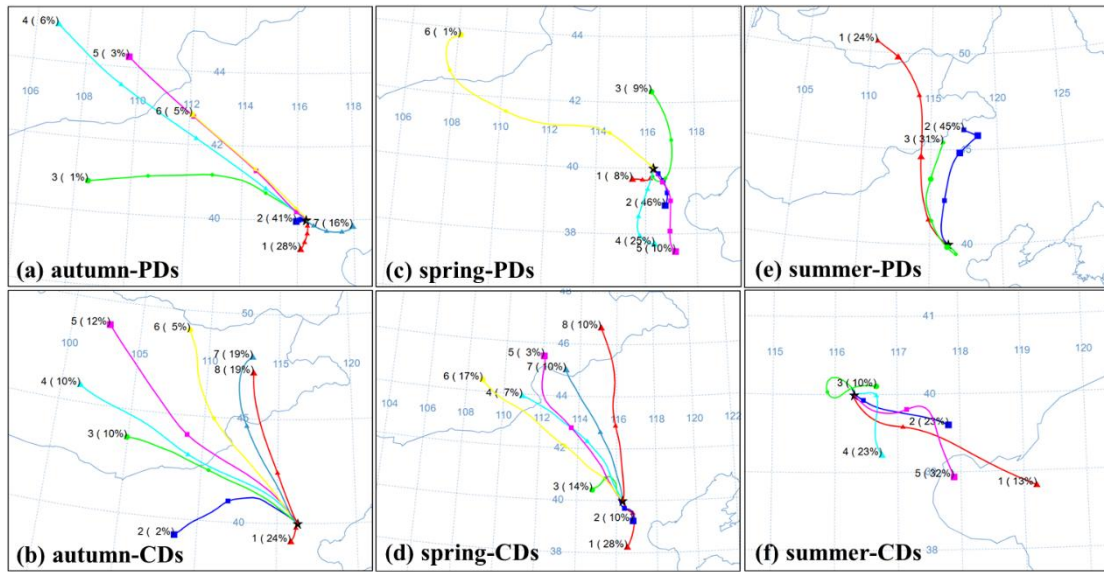

Figure S5. Clustered HYSPLIT backward trajectories during PDs and CDs across different seasons

**Table S1.** Specifications and functions of fluidic channels in the system

| Channel    | Flow Rate (mL/min) | Function                                                                 |
|------------|--------------------|--------------------------------------------------------------------------|
| Channel 1  | 0.80 mL/min        | Transport ROS <sub>g</sub> test solution to the first premixing chamber  |
| Channel 2  | 1.00 mL/min        | Transport DI water to glass spiral coil                                  |
| Channel 3  | 0.15 mL/min        | Transport DCFH solution to the first premixing chamber                   |
| Channel 4  | 0.15 mL/min        | Transport HRP solution to the first premixing chamber                    |
| Channel 5  | 1.50 mL/min        | Discharge waste liquid                                                   |
| Channel 6  | 0.15 mL/min        | Transport DCFH solution to the second premixing chamber                  |
| Channel 7  | 0.15 mL/min        | Transport HRP solution to the second premixing chamber                   |
| Channel 8  | 1.50 mL/min        | Transport DI water to the rotating wet annular denuder                   |
| Channel 9  | 0.80 mL/min        | Transport ROS <sub>p</sub> test solution to the second premixing chamber |
| Channel 10 | 1.00 mL/min        | Transport DI water to the spray growth collection chamber                |
| Channel 11 | 1.50 mL/min        | Discharge waste liquid                                                   |

**Table S2.** Seasonal statistics of ROS and associated atmospheric species under clean and polluted conditions.

| Parameter                                     | Autumn  |         |         | Winter  |     |         | Spring  |         |         | Summer  |         |         |
|-----------------------------------------------|---------|---------|---------|---------|-----|---------|---------|---------|---------|---------|---------|---------|
|                                               | CDs     | PDs     | Mean    | CDs     | PDs | Mean    | CDs     | PDs     | Mean    | CDs     | PDs     | Mean    |
| ROS <sub>g</sub><br>(ppbv)                    | 0.89    | 1.34    | 1.03    | 1.22    | /   | 1.22    | 2.10    | 3.02    | 2.28    | 1.04    | 1.29    | 1.16    |
| ROS <sub>p</sub><br>( $\mu\text{g m}^{-3}$ )  | 0.16    | 0.13    | 0.15    | 0.23    | /   | 0.23    | 0.45    | 0.45    | 0.45    | 0.24    | 0.41    | 0.33    |
| O <sub>3</sub><br>(ppbv)                      | 24.70   | 28.07   | 26.39   | 29.5    | /   | 29.5    | 60.60   | 104.74  | 82.67   | 59.42   | 101.28  | 80.35   |
| j(O <sup>1</sup> D)                           | 1.84E-6 | 1.81E-6 | 1.83E-6 | 1.71E-6 | /   | 1.71E-6 | 4.52E-6 | 7.13E-6 | 5.09E-6 | 1.03E-5 | 1.04E-5 | 1.03E-5 |
| PM <sub>2.5</sub><br>( $\mu\text{g m}^{-3}$ ) | 33.45   | 94.88   | 52.86   | 16.1    | /   | 16.1    | 24.63   | 40.17   | 28.04   | 23.51   | 27.49   | 25.30   |
| NO<br>(ppbv)                                  | 19.53   | 26.07   | 21.59   | 14.4    | /   | 14.4    | 10.15   | 12.33   | 10.63   | 9.10    | 12.93   | 10.83   |
| NO <sub>2</sub><br>(ppbv)                     | 18.98   | 20.36   | 19.42   | 11.3    | /   | 11.3    | 2.63    | 5.05    | 3.16    | 1.32    | 2.28    | 1.75    |
| SO <sub>2</sub><br>(ppbv)                     | 0.56    | 0.55    | 0.56    | 1.03    | /   | 1.03    | 0.54    | 0.45    | 0.52    | 0.25    | 0.28    | 0.27    |
| HONO<br>(ppbv)                                | 0.97    | 1.73    | 1.21    | 0.34    | /   | 0.34    | 0.40    | 0.68    | 0.46    | 0.64    | 0.85    | 0.74    |
| NH <sub>3</sub><br>(ppbv)                     | 16.74   | 24.62   | 19.23   | 5.54    | /   | 5.54    | 17.01   | 29.22   | 19.69   | 27.22   | 21.73   | 24.75   |
| HNO <sub>3</sub><br>(ppbv)                    | 0.43    | 0.80    | 0.55    | 0.13    | /   | 0.13    | 0.20    | 0.28    | 0.22    | 0.30    | 0.46    | 0.37    |
| Isoprene<br>(ppbv)                            | 0.05    | 0.06    | 0.05    | 0.02    | /   | 0.02    | 0.00    | 0.00    | 0.00    | 1.38    | 1.51    | 1.45    |
| Alkenes<br>(ppbv)                             | 0.46    | 0.62    | 0.51    | 0.26    | /   | 0.26    | 0.41    | 0.48    | 0.43    | 0.22    | 0.20    | 0.21    |
| T<br>(K)                                      | 281.96  | 283.84  | 282.55  | 271.22  | /   | 271.22  | 292.41  | 297.17  | 293.45  | 301.73  | 302.76  | 302.19  |
| RH                                            | 0.67    | 0.78    | 0.70    | 0.4     | /   | 0.44    | 0.45    | 0.57    | 0.47    | 0.67    | 0.49    | 0.59    |
| Wind<br>Speed<br>( $\text{m s}^{-1}$ )        | 1.68    | 1.19    | 1.52    | 2.21    | /   | 2.21    | 2.61    | 2.27    | 2.53    | 2.05    | 1.81    | 1.94    |

**Table S3.** Summary of reported ROS concentrations from previous field observations

| Phase                                        | season | Site                            | Mean  | Max  | Min    | Reference                  |
|----------------------------------------------|--------|---------------------------------|-------|------|--------|----------------------------|
| ROS <sub>g</sub><br>(ppbv)                   | Autumn | Beijing, China (2024)           | 1.03  | 2.32 | 0.07   | This study                 |
|                                              |        | Beijing, China (2015)           | 0.36  | 0.42 | 0.25   | (Qin et al., 2024)         |
|                                              |        | Wangdu, China (2017)            | 0.17  | 1.00 | 0.05   | (Ye et al., 2021a)         |
|                                              |        | Gwangju, Korea (2002)           | 0.28  | 0.89 | 0.02   | (Hong et al., 2008)        |
|                                              | Winter | Beijing, China (2024)           | 1.22  | 2.46 | 0.07   | This study                 |
|                                              |        | Beijing, China (2016)           | 0.44  | /    | /      | (Huang et al., 2016)       |
|                                              |        | Beijing, China (2017)           | 0.25  | 0.90 | 0.25   | (Ye et al., 2018)          |
|                                              |        | Manaus, Brazil (2022)           | 0.30  | 1.94 | 0.07   | (Hamryszczak et al., 2023) |
|                                              | Spring | Beijing, China (2025)           | 2.32  | 6.82 | 0.07   | This study                 |
|                                              |        | Beijing, China (2016)           | 0.25  | /    | /      | (Huang et al., 2016)       |
|                                              |        | Taian, China (2018)             | 2.05  | 5.36 | 0.05   | (Ye et al., 2021b)         |
|                                              |        | Zion, US (2017)                 | 2.10  | 8.00 | 0.50   | (Vermeuel et al., 2019)    |
|                                              | Summer | Beijing, China (2025)           | 1.19  | 4.09 | 0.07   | This study                 |
|                                              |        | Wangdu, China (2014)            | 0.51  | 11.3 | 0.01   | (Wang et al., 2016)        |
|                                              |        | Seoul, Korea (2002)             | 0.77  | 5.19 | 0.04   | (Hong et al., 2008)        |
|                                              |        | St. Louis, United States (2020) | 0.04  | 0.05 | 0.02   | (Eftekhari et al., 2021)   |
| ROS <sub>p</sub><br>( $\mu\text{g m}^{-3}$ ) | Autumn | Beijing, China (2024)           | 0.15  | 0.35 | 0.006  | This study                 |
|                                              |        | Beijing, China (2015)           | 0.33  | 0.46 | 0.24   | (Qin et al., 2024)         |
|                                              |        | Milan, Italy (2013)             | 0.01  | 0.01 | 0.003  | (Perrone et al., 2016)     |
|                                              |        | Bern, Switzerland (2014)        | 0.07  | 0.10 | 0.04   | (Zhou et al., 2019)        |
|                                              | Winter | Beijing, China (2024)           | 0.23  | 0.81 | 0.03   | This study                 |
|                                              |        | Beijing, China (2016)           | 0.45  | /    | /      | (Huang et al., 2016)       |
|                                              |        | Shanghai, China (2023)          | 0.09  | /    | /      | (Liu et al., 2023)         |
|                                              |        | Milan, Italy (2013)             | 0.01  | 0.02 | 0.01   | (Perrone et al., 2016)     |
|                                              | Spring | Beijing, China (2025)           | 0.39  | 0.98 | 0.06   | This study                 |
|                                              |        | Beijing, China (2016)           | 0.19  | /    | /      | (Huang et al., 2016)       |
|                                              |        | Beijing, China (2012)           | 0.01  | 0.01 | 0.0031 | (Liu et al., 2014)         |
|                                              |        | Austin, United States (2012)    | 0.05  | 0.13 | 0.0024 | (Khurshid et al., 2014)    |
|                                              | Summer | Beijing, China (2025)           | 0.39  | 2.35 | 0.006  | This study                 |
|                                              |        | Beijing, China (2015)           | 0.44  | /    | /      | (Qin et al., 2024)         |
|                                              |        | Rochester, United States (2011) | 16.90 | /    | /      | (Wang et al., 2011)        |
|                                              |        | St. Louis, United States (2020) | 0.09  | 0.14 | 0.03   | (Eftekhari et al., 2021)   |

## Reference

- Eftekhari, A., Fortenberry, C. F., Williams, B. J., Walker, M. J., Dang, A., Pfaff, A., Ercal, N., and Morrison, G. C.: Continuous measurement of reactive oxygen species inside and outside of a residential house during summer, *Indoor Air*, 31, 1199-1216, <https://doi.org/10.1111/ina.12789>, 2021.
- Hamryszczak, Z., Hartmann, A., Dienhart, D., Hafermann, S., Brendel, B., Königstedt, R., Parchatka, U., Lelieveld, J., and Fischer, H.: HYPHOP: a tool for high-altitude, long-range monitoring of hydrogen peroxide and higher organic peroxides in the atmosphere, *Atmospheric Measurement Techniques Discussions*, 2023, 1-25, <https://doi.org/10.5194/amt-16-4741-2023>, 2023.
- Hong, S. B., Kim, G. S., Kang, C. H., and Lee, J. H.: Measurement of ambient hydroperoxides using an automated HPLC system and various factors which affect variations of their concentrations in Korea, *Environmental monitoring and assessment*, 147, 23-34, <https://doi.org/10.1007/s10661-007-0094-4>, 2008.
- Huang, W., Zhang, Y., Zhang, Y., Zeng, L., Dong, H., Huo, P., Fang, D., and Schauer, J. J.: Development of an automated sampling-analysis system for simultaneous measurement of reactive oxygen species (ROS) in gas and particle phases: GAC-ROS, *Atmospheric environment*, 134, 18-26, <https://doi.org/10.1016/j.atmosenv.2016.03.038>, 2016.
- Khurshid, S. S., Siegel, J. A., and Kinney, K. A.: Indoor particulate reactive oxygen species concentrations, *Environmental research*, 132, 46-53, <https://doi.org/10.1016/j.envres.2014.03.026>, 2014.
- Liu, Q., Zhang, Y., Liu, Y., and Zhang, M.: Characterization of springtime airborne particulate matter-bound reactive oxygen species in Beijing, *Environmental Science and Pollution Research*, 21, 9325-9333, <https://doi.org/10.1007/s11356-014-2843-6>, 2014.
- Liu, Y., Tang, X., Zhang, Z., Li, L., and Chen, J.: Development and Field Testing of an Online Monitoring System for Atmospheric Particle-Bound Reactive Oxygen Species (ROS), *Atmosphere*, 14, 924, <https://doi.org/10.3390/atmos14060924>, 2023.
- Perrone, M. G., Zhou, J., Malandrino, M., Sangiorgi, G., Rizzi, C., Ferrero, L., Dommen, J., and Bolzacchini, E.: PM chemical composition and oxidative potential of the soluble fraction of particles at two sites in the urban area of Milan, Northern Italy, *Atmospheric Environment*, 128, 104-113, <https://doi.org/10.1016/j.atmosenv.2015.12.040>, 2016.
- Qin, Y., Zhang, X., Huang, W., Qin, J., Hu, X., Cao, Y., Zhao, T., Zhang, Y., Tan, J., and Zhang, Z.: Measurement report: Impact of emission control measures on environmental persistent free radicals and reactive oxygen species—A short-term case study in Beijing, *Atmospheric Chemistry and Physics*, 24, 8737-8750, <https://doi.org/10.5194/acp-24-8737-2024>, 2024.
- Vermeuel, M. P., Novak, G. A., Alwe, H. D., Hughes, D. D., Kaleel, R., Dickens, A. F., Kenski, D., Czarnetzki, A. C., Stone, E. A., and Stanier, C. O.: Sensitivity of ozone production to NO<sub>x</sub> and VOC along the Lake Michigan coastline, *Journal of Geophysical Research: Atmospheres*, 124, 10989-11006, <https://doi.org/10.1029/2019JD030842>, 2019.
- Wang, Y., Hopke, P. K., Sun, L., Chalupa, D. C., and Utell, M. J.: Laboratory and Field Testing of an Automated Atmospheric Particle-Bound Reactive Oxygen Species Sampling-Analysis System, *Journal of Toxicology*, 2011, 419476, <https://doi.org/10.1155/2011/419476>, 2011.
- Wang, Y., Chen, Z., Wu, Q., Liang, H., Huang, L., Li, H., Lu, K., Wu, Y., Dong, H., and Zeng, L.: Observation of atmospheric peroxides during Wangdu Campaign 2014 at a rural site in the North China Plain, *Atmospheric Chemistry and Physics*, 16, 10985-11000, <https://doi.org/10.5194/acp-16-10985-2016>, 2016.
- Ye, C., Chen, H., Hoffmann, E. H., Mettke, P., Tilgner, A., He, L., Mutzel, A., Brüggemann, M., Poulain, L., and Schaefer, T.: Particle-phase photoreactions of HULIS and TMIs establish a strong source of H<sub>2</sub>O<sub>2</sub>

and particulate sulfate in the winter North China Plain, *Environmental Science & Technology*, 55, 7818-7830, <https://doi.org/10.1021/acs.estlett.8b00579>, 2021a.

Ye, C., Liu, P., Ma, Z., Xue, C., Zhang, C., Zhang, Y., Liu, J., Liu, C., Sun, X., and Mu, Y.: High H<sub>2</sub>O<sub>2</sub> concentrations observed during haze periods during the winter in Beijing: importance of H<sub>2</sub>O<sub>2</sub> oxidation in sulfate formation, *Environmental Science & Technology Letters*, 5, 757-763, <https://doi.org/10.1021/acs.estlett.8b00579>, 2018.

Ye, C., Xue, C., Zhang, C., Ma, Z., Liu, P., Zhang, Y., Liu, C., Zhao, X., Zhang, W., and He, X.: Atmospheric hydrogen peroxide (H<sub>2</sub>O<sub>2</sub>) at the foot and summit of Mt. Tai: Variations, sources and sinks, and implications for ozone formation chemistry, *Journal of Geophysical Research: Atmospheres*, 126, e2020JD033975, <https://doi.org/10.1029/2020JD033975>, 2021b.

Zhou, J., Elser, M., Huang, R.-J., Krapf, M., Fröhlich, R., Bhattu, D., Stefenelli, G., Zotter, P., Bruns, E. A., and Pieber, S. M.: Predominance of secondary organic aerosol to particle-bound reactive oxygen species activity in fine ambient aerosol, *Atmospheric Chemistry and Physics*, 19, 14703-14720, <https://doi.org/10.5194/acp-19-14703-2019>, 2019.
